# Supplementary material for: The Composition-Tunable Polydiacetylenic Complex Films: Conformational Change upon Thermal Stimulation and Preferential Interaction with Specific Small Molecules
Source: Hindawi journal article supplement (doi:10.1155/2017/5983106), 2017-01-01
Supplement: f1 [file 5983106.f1.docx]

**The Composition-Tunable Polydiacetylenic Complex Films: Conformational Change upon Thermal Stimulation and Preferential Interaction with Specific Small Molecules**

Chao Wang,1,† Jin Hyuk Park,2,† Songwen Tan,3,† Chunzhi Cui,1,2,* Jing-Yi Jin,1,* and Dong June Ahn2,3,4,*

1Department of Chemistry, College of Science, and Key Laboratory of Natural Resource of Changbai Mountains & Functional Molecules, Ministry of Education, Yanbian University, Yanji 133002, China

2Department of Chemical and Biological Engineering, Korea University, Seoul 02841, Korea

3Department of Bio-Microsystem Technology, Korea University, Seoul 02841, Korea

4KU-KIST Graduate School of Converging Science and Technology, Korea University, Seoul 02841, Korea

*Corresponding author

E-mail address: [cuichunzhi@ybu.edu.cn](mailto:cuichunzhi@ybu.edu.cn) (C. Cui)

†These authors contributed equally to this work.

FIGURE S1:Magnified X-ray diffraction patterns for 3:1, 2:1, and 1:1 polydiacetylenic films.

FIGURE S2:Photographic images of (a) 3:1, (b) 2:1, and (c) 1:1 polydiacetylenic films upon repeated heating-and-cooling cycles.
